# Supplementary material for: Plasmodium vivax msp-3α polymorphisms: analysis in the Indian subcontinent
Source: Springer Nature journal article supplement (doi:10.1186/s12936-016-1524-y), 2016-09-23

Additional figure 1. (A) Polymerase chain reaction amplified fragments of *Pvm*sp-3 $\alpha$  gene from *P. vivax* field isolates. Digestion pattern using Restriction fragment length polymorphism of *Pvm*sp-3 $\alpha$  using *Alu*I (B) and *Hha*I (C) restriction enzymes. 1Kb and 100bp DNA markers.

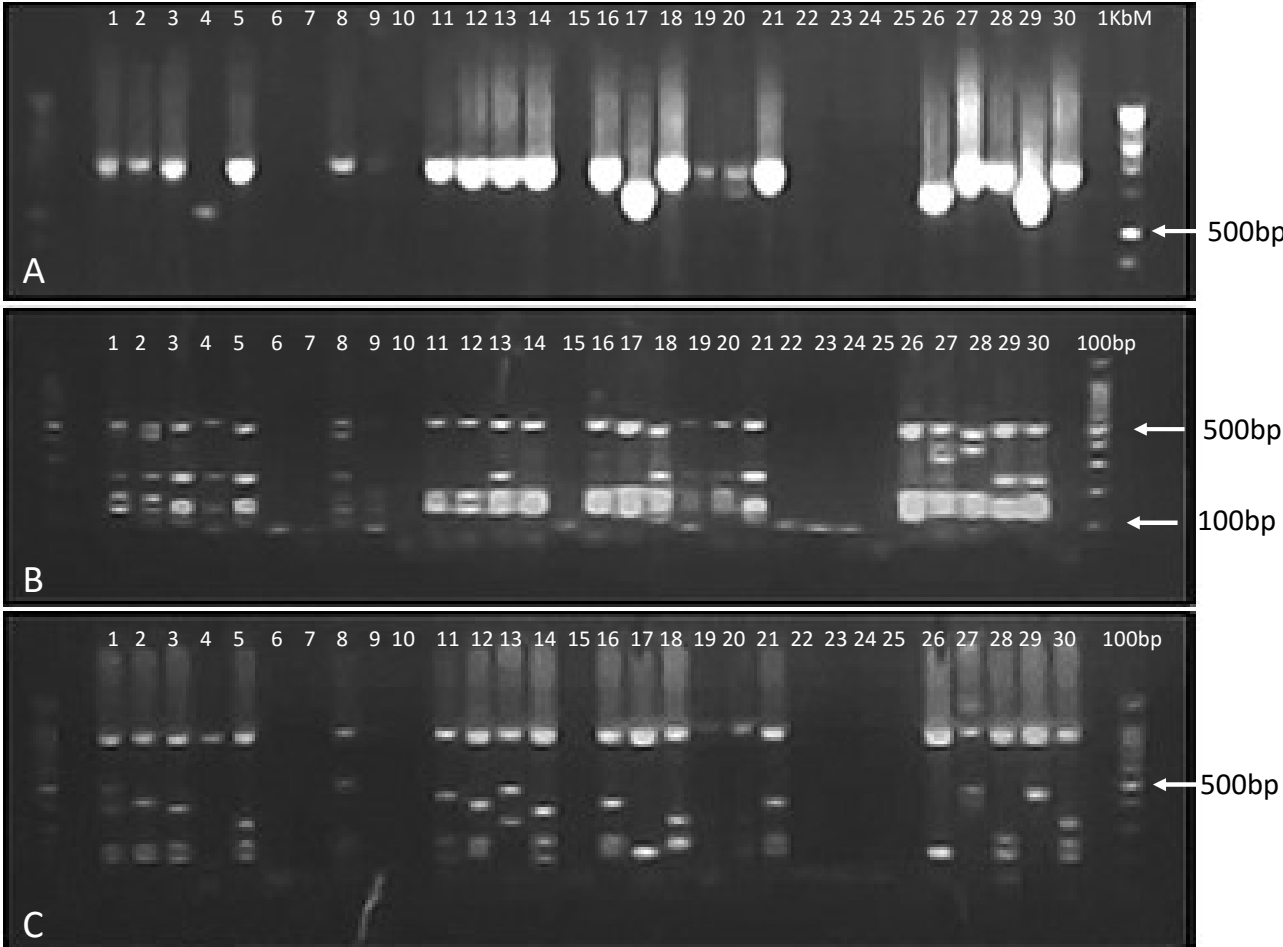

Supplement: MOESM1 [file 10740204]
